# Supplementary material for: Randomized Controlled Ferret Study to Assess the Direct Impact of 2008–09 Trivalent Inactivated Influenza Vaccine on A(H1N1)pdm09 Disease Risk
Source: PubMed Central journal article supplement (PMC3903544; doi:10.1371/journal.pone.0086555), 2014-01-27
Supplement: pone.0086555.s001.pdf [file pone.0086555.s001.pdf]

**Figure S1. HA1 microarray values for study and non-study antigens by group and study day**

**A) Pre-immunization**

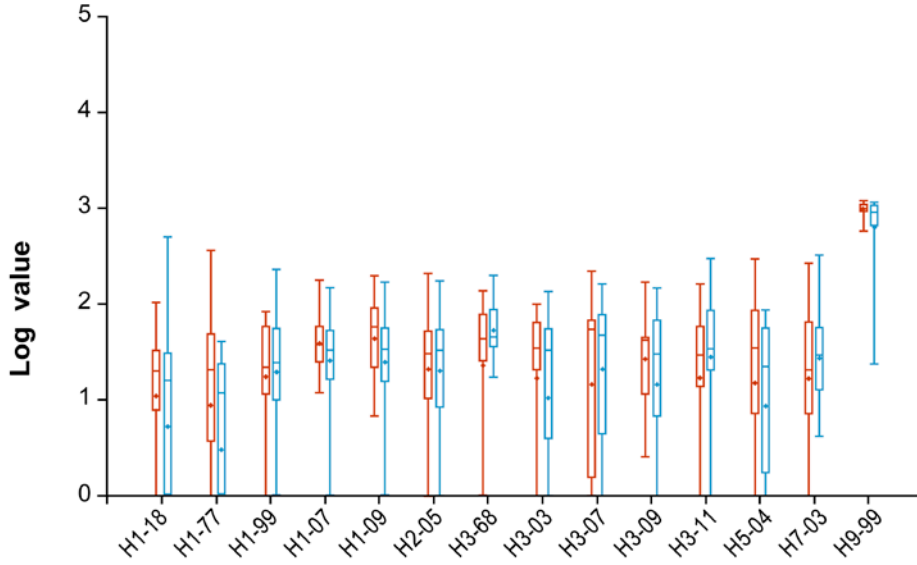

**B) Day 28**

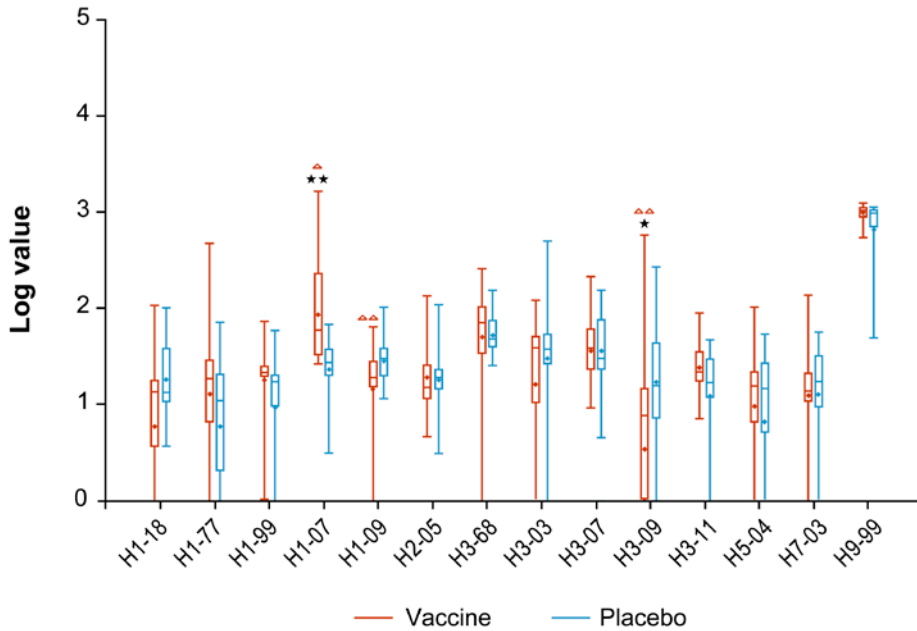

Box plots display median (dash) and mean (dot) of log-transformed HA1 immuno-blot antibody signal values for study and non-study antigens at (A) pre-immunization; (B) day 28; and overleaf (C) day 49 (Ch0); and (D) day 63 (Ch+14). The box extends to the 25<sup>th</sup>/75<sup>th</sup> percentiles and whiskers extend to minimum/maximum values. Antigens are as indicated in **Table S3**. Sample size as follows: Pre-immunization Vaccine=15, Placebo=16 (3 ferrets each per group pre-shipment serum substituted owing to insufficient day 0 available); Day 28 Vaccine=14, Placebo=15. \*\* indicates statistical significance at  $p<0.01$  and \* indicates statistical significance at  $p<0.05$  in comparing vaccine to placebo group at the designated time point.  $\Delta\Delta$  indicates statistical significance at  $p<0.01$  and  $\Delta$  indicates statistical significance at  $p<0.05$  in comparing day 28 to pre-immunization (panel B) within groups, colour coded by vaccine (red) or placebo (blue).

**Figure S1. HA1 microarray values for study and non-study antigens by group and study day**  
**C) Day 49 (Ch0)**

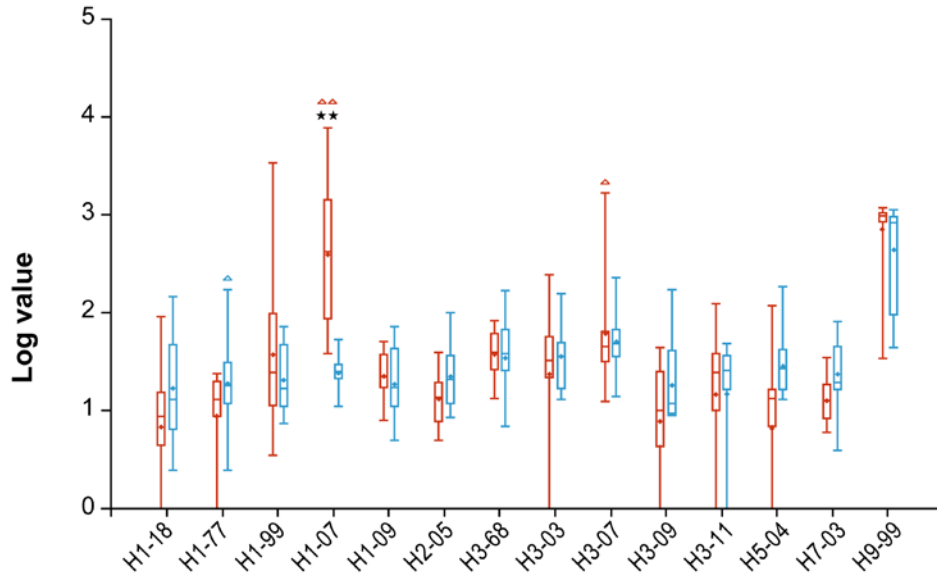

**D) Day 63 (Ch+14)**

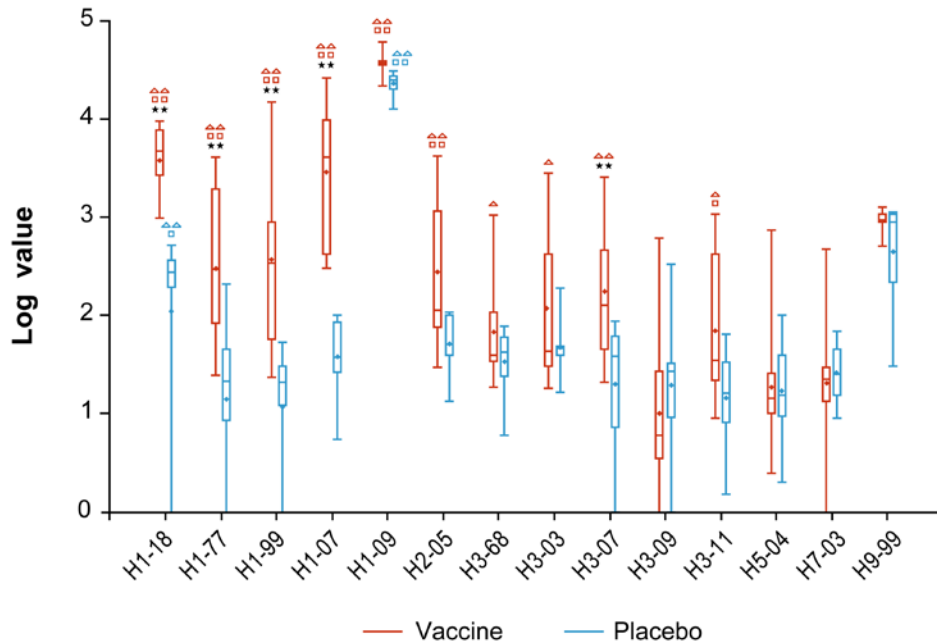

Box plots display median (dash) and mean (dot) of log-transformed HA1 immuno-blot antibody signal values for study and non-study antigens at (C) day 49 (Ch0) and (D) day 63 (Ch+14). The box extends to the 25<sup>th</sup>/75<sup>th</sup> percentiles and whiskers extend to minimum/maximum values. Antigens are as indicated in **Table S3**. Sample size as follows: Day 49 Vaccine=12, Placebo=11; Day 63 Vaccine=9, Placebo=8. \*\* indicates statistical significance at  $p < 0.01$  and \* indicates statistical significance at  $p < 0.05$  in comparing vaccine to placebo group at the designated time point.  $\Delta\Delta$  indicates statistical significance at  $p < 0.01$  and  $\Delta$  indicates statistical significance at  $p < 0.05$  in comparing day 49 (panel C) or day 63 (panel D) to pre-immunization within groups, colour coded by vaccine (red) or placebo (blue).  $\square\square$  indicates statistical significance at  $p < 0.01$  and  $\square$  indicates statistical significance at  $p < 0.05$  in comparing day 63 to day 49 within groups, colour coded per above by study group.
