# Supplementary material for: Randomized Controlled Ferret Study to Assess the Direct Impact of 2008–09 Trivalent Inactivated Influenza Vaccine on A(H1N1)pdm09 Disease Risk
Source: PubMed Central journal article supplement (PMC3903544; doi:10.1371/journal.pone.0086555), 2014-01-27
Supplement: pone.0086555.s003.pdf [file pone.0086555.s003.pdf]

**Table S2. Pairwise identity (%<sup>a</sup> (number of amino acid mutations)) in influenza A hemagglutinin 1 (HA1) peptide and antigenic sites across viruses used in antibody assays and A(H1N1)pdm09 challenge**

| <b>H3 Subtype</b><br>(*Antigenic sites A-E comprising 131 amino acid residues[1]) | <b>HA1</b>                            |                                  |                               | <b>Antigenic Sites*</b>               |                                  |                               |
|-----------------------------------------------------------------------------------|---------------------------------------|----------------------------------|-------------------------------|---------------------------------------|----------------------------------|-------------------------------|
|                                                                                   | <b>A/Brisbane/10/2007 (reference)</b> | <b>A/Uruguay/716/2007 X-175C</b> | <b>Assay Brisbane/10/2007</b> | <b>A/Brisbane/10/2007 (reference)</b> | <b>A/Uruguay/716/2007 X-175C</b> | <b>Assay Brisbane/10/2007</b> |
| <b>A/Brisbane/10/2007 (reference)</b>                                             | –                                     | –                                | –                             | –                                     | –                                | –                             |
| <b>A/Uruguay/716/2007 X-175C</b>                                                  | 99.0 (3)                              | –                                | –                             | 97.7 (3)                              | –                                | –                             |
| <b>Assay Brisbane/10/2007</b>                                                     | 99.4 (2)                              | 99.0 (3)                         | –                             | 98.5 (2)                              | 97.7 (3)                         | –                             |

| <b>H1 Subtype</b><br>(**Antigenic sites Cb, Sa, Ca2, Ca1, Sb comprising 50 amino acid residues[2]) | <b>HA1</b>                            |                                 |                               |                                         |                                   |                                       | <b>Antigenic Sites**</b>              |                                 |                               |                                         |                                   |                                       |
|----------------------------------------------------------------------------------------------------|---------------------------------------|---------------------------------|-------------------------------|-----------------------------------------|-----------------------------------|---------------------------------------|---------------------------------------|---------------------------------|-------------------------------|-----------------------------------------|-----------------------------------|---------------------------------------|
|                                                                                                    | <b>A/Brisbane/59/2007 (reference)</b> | <b>Brisbane/59/2007 IVR-148</b> | <b>Assay Brisbane/59/2007</b> | <b>A/California/07/2009 (reference)</b> | <b>Assay A/California/07/2009</b> | <b>Challenge A/California/07/2009</b> | <b>A/Brisbane/59/2007 (reference)</b> | <b>Brisbane/59/2007 IVR-148</b> | <b>Assay Brisbane/59/2007</b> | <b>A/California/07/2009 (reference)</b> | <b>Assay A/California/07/2009</b> | <b>Challenge A/California/07/2009</b> |
| <b>A/Brisbane/59/2007 (reference)</b>                                                              | –                                     | –                               | –                             | –                                       | –                                 | –                                     | –                                     | –                               | –                             | –                                       | –                                 | –                                     |
| <b>A/Brisbane/59/2007 IVR-148</b>                                                                  | 99.7 (1)                              | –                               | –                             | –                                       | –                                 | –                                     | 98 (1)                                | –                               | –                             | –                                       | –                                 | –                                     |
| <b>Assay Brisbane/59/2007</b>                                                                      | 99.7 (1)                              | 100 (0)                         | –                             | –                                       | –                                 | –                                     | 98 (1)                                | 100 (0)                         | –                             | –                                       | –                                 | –                                     |
| <b>A/California/07/2009 (reference)</b>                                                            | 72.8 (89)                             | 72.5 (90)                       | 72.5 (90)                     | –                                       | –                                 | –                                     | 50 (25)                               | 48 (26)                         | 48 (26)                       | –                                       | –                                 | –                                     |
| <b>Assay A/California/07/2009</b>                                                                  | 73.1 (88)                             | 72.8 (89)                       | 72.8 (89)                     | 99.7 (1)                                | –                                 | –                                     | 50 (25)                               | 48 (26)                         | 48 (26)                       | 100 (0)                                 | –                                 | –                                     |
| <b>Challenge A/California/07/2009<sup>‡</sup></b>                                                  | 71.9 (92)                             | 71.6 (93)                       | 71.6 (93)                     | 99.1 (3)                                | 98.8 (4)                          | –                                     | 48 (26)                               | 46 (27)                         | 46 (27)                       | 98 (1)                                  | 98 (1)                            | –                                     |

a. Percentage pairwise identity calculated as  $[1 - (\text{number of AA substitutions in HA1 or antigenic sites}) / (\text{total HA1 or antigenic site AA residues})] \times 100\%$

[1] Bush RM, Bender CA, Subbarao K, Cox NJ, Fitch WM. Predicting the evolution of human influenza A. Science 1999;286:1921-5.

[2] Brownlee, G.G & Fodor E. 2001 The predicted antigenicity of the hemagglutinin of the 1918 Spanish influenza pandemic suggests an avian origin. Phil. Trans. R. Soc. Lond. 356, 1871-1876.

<sup>‡</sup>A/Quebec/144147/2009(H1N1) [GenBank Accession Numbers FN434457-FN434464
