# Supplementary material for: Randomized Controlled Ferret Study to Assess the Direct Impact of 2008–09 Trivalent Inactivated Influenza Vaccine on A(H1N1)pdm09 Disease Risk
Source: PubMed Central journal article supplement (PMC3903544; doi:10.1371/journal.pone.0086555), 2014-01-27
Supplement: pone.0086555.s004.pdf [file pone.0086555.s004.pdf]

**Table S3. Recombinant proteins of the HA1 part of the hemagglutinin (HA) protein of study (grey shaded) and non-study viruses used in the protein microarray assay**

| <b>Name</b> | <b>Influenza virus strain</b>            | <b>Manufacturer</b> |
|-------------|------------------------------------------|---------------------|
| H1-18       | A/South Carolina/1/1918 (H1N1)           | Immune Technology   |
| H1-77       | A/USSR/92/1977 (H1N1)                    | Immune Technology   |
| H1-99       | A/New Caledonia/20/1999 (H1N1)           | Immune Technology   |
| H1-07       | A/Brisbane/59/2007 (H1N1)                | Immune Technology   |
| H1-09       | A/California/06/2009 [A(H1N1)pdm09]      | Immune Technology   |
| H2-05       | 121808-#19-(052 and 053) (H2N2)          | Immune Technology   |
| H3-68       | A/Aichi/2/1968 (H3N2)                    | Sino Biological     |
| H3-03       | A/Wyoming/3/2003 (H3N2)                  | Immune Technology   |
| H3-07       | A/Brisbane/10/2007 (H3N2)                | Immune Technology   |
| H3-09       | A/Victoria/210/2009 (H3N2)               | Immune Technology   |
| H3-11       | A/Victoria/361/2011 (H3N2)               | Immune Technology   |
| H5-04       | A/Vietnam/1194/2004 (H5N1)               | Immune Technology   |
| H7-03       | A/Chicken/Netherlands/1/2003 (H7N7)      | Immune Technology   |
| H9-99       | A/Guinea fowl/Hong Kong/WF10/1999 (H9N2) | Immune Technology   |
