# Supplementary material for: Randomized Controlled Ferret Study to Assess the Direct Impact of 2008–09 Trivalent Inactivated Influenza Vaccine on A(H1N1)pdm09 Disease Risk
Source: PubMed Central journal article supplement (PMC3903544; doi:10.1371/journal.pone.0086555), 2014-01-27
Supplement: pone.0086555.s005.pdf [file pone.0086555.s005.pdf]

**Table S4. Individual ferret haemagglutination inhibition (HI), microneutralization (MN) and ELISA (E) antibody titers\* among animals sacrificed at day 54 (Ch+5) with percent weight loss at Ch+5**

| Ferret ID:          | VACCINATED FERRETS                           |    |     |                                               |     |     |                                           |    |     |                                             |    |     | PLACEBO FERRETS                           |    |     |                                            |    |     |                                              |    |     |                                            |     |      |
|---------------------|----------------------------------------------|----|-----|-----------------------------------------------|-----|-----|-------------------------------------------|----|-----|---------------------------------------------|----|-----|-------------------------------------------|----|-----|--------------------------------------------|----|-----|----------------------------------------------|----|-----|--------------------------------------------|-----|------|
|                     | 63<br>(Lung Score: 0.5)<br>[% wt loss = 3.7] |    |     | 69<br>(Lung Score: 11.5)<br>[% wt loss = 7.8] |     |     | 80<br>(Lung Score: 1)<br>[%wt loss = 6.0] |    |     | 82<br>(Lung Score: 10)<br>[%wt loss = 10.0] |    |     | 58<br>(Lung Score:4)<br>[% wt loss = 7.7] |    |     | 60<br>(Lung Score: 3)<br>[% wt loss = 4.8] |    |     | 81<br>(Lung Score: 0.5)<br>[% wt loss = 4.9] |    |     | 84<br>(Lung Score: 1)<br>[% wt loss = 1.1] |     |      |
| Antibody Assay:     | HI                                           | MN | E   | HI                                            | MN  | E   | HI                                        | MN | E   | HI                                          | MN | E   | HI                                        | MN | E   | HI                                         | MN | E   | HI                                           | MN | E   | HI                                         | MN  | E    |
| <b>Pre-Shipment</b> |                                              |    |     |                                               |     |     |                                           |    |     |                                             |    |     |                                           |    |     |                                            |    |     |                                              |    |     |                                            |     |      |
| sH1N1               | 5                                            |    |     | 5                                             |     |     | 5                                         |    |     | 5                                           |    |     | 5                                         |    |     | 5                                          |    |     | 5                                            |    |     | 5                                          |     |      |
| sH3N2               | 5                                            | NA | 1.2 | 5                                             | NA  | 1.1 | 5                                         | NA | 1.5 | 5                                           | NA | 1.4 | 5                                         | NA | 1.1 | 5                                          | NA | 1.2 | 5                                            | NA | 1.5 | 5                                          | NA  | 0.84 |
| Influenza B         | 5                                            |    |     | 5                                             |     |     | 5                                         |    |     | 5                                           |    |     | 5                                         |    |     | 5                                          |    |     | 5                                            |    |     | 5                                          |     |      |
| A(H1N1)pdm09        | 5                                            |    |     | 5                                             |     |     | 5                                         |    |     | 5                                           |    |     | 5                                         |    |     | 5                                          |    |     | 5                                            |    |     | 5                                          |     |      |
| <b>Day 0</b>        |                                              |    |     |                                               |     |     |                                           |    |     |                                             |    |     |                                           |    |     |                                            |    |     |                                              |    |     |                                            |     |      |
| sH1N1               | 14.1                                         | 5  |     | 10                                            | NA  |     | 5                                         | 5  |     | 5                                           | 5  |     | 5                                         | 5  |     | 5                                          | 5  |     | 5                                            | 5  |     | NA                                         | NA  |      |
| sH3N2               | 5                                            | 5  | 1.0 | 5                                             | 5   | 1.0 | 5                                         | 5  | 1.0 | 5                                           | 5  | 1.1 | 5                                         | 5  | 1.0 | 5                                          | 5  | 1.1 | 5                                            | 5  | 1.0 | NA                                         | NA  | NA   |
| Influenza B         | 5                                            | 5  |     | 5                                             | 5   |     | 5                                         | 5  |     | 5                                           | 5  |     | 5                                         | 5  |     | 5                                          | 5  |     | 5                                            | 5  |     | NA                                         | NA  |      |
| A(H1N1)pdm09        | 5                                            | 5  |     | 5                                             | NA  |     | 5                                         | 5  |     | 5                                           | 5  |     | 5                                         | 5  |     | 5                                          | 5  |     | 5                                            | 5  |     | NA                                         | NA  |      |
| <b>Day 28</b>       |                                              |    |     |                                               |     |     |                                           |    |     |                                             |    |     |                                           |    |     |                                            |    |     |                                              |    |     |                                            |     |      |
| sH1N1               | 5                                            | 5  |     | 40                                            | 57  |     | 5                                         | 5  |     | 5                                           | 5  |     | 5                                         | 5  |     | 5                                          | 5  |     | 5                                            | 5  |     | 7                                          | 5   |      |
| sH3N2               | 5                                            | 5  |     | 80                                            | 113 |     | 5                                         | 5  |     | 5                                           | 5  |     | 5                                         | 5  |     | 10                                         | 5  |     | 5                                            | 5  |     | 5                                          | 5   |      |
| Influenza B         | NA                                           | NA | NA  | NA                                            | NA  | NA  | NA                                        | NA | NA  | NA                                          | NA | NA  | NA                                        | NA | NA  | NA                                         | NA | NA  | NA                                           | NA | NA  | NA                                         | NA  | NA   |
| A(H1N1)pdm09        | 5                                            | 5  |     | 5                                             | 5   |     | 5                                         | 5  |     | 5                                           | 5  |     | 5                                         | 5  |     | 5                                          | 5  |     | 5                                            | 5  |     | 5                                          | 5   |      |
| <b>Day 49/Ch0</b>   |                                              |    |     |                                               |     |     |                                           |    |     |                                             |    |     |                                           |    |     |                                            |    |     |                                              |    |     |                                            |     |      |
| sH1N1               | 10                                           | 5  |     | 28                                            | 57  |     | 10                                        | 5  |     | 5                                           | 5  |     | 5                                         | 5  |     | 5                                          | 5  |     | 5                                            | 5  |     | 5                                          | 5   |      |
| sH3N2               | 5                                            | 5  | 0.4 | 80                                            | 113 | 0.2 | 5                                         | 5  | 0.3 | 5                                           | 5  | 0.3 | 5                                         | 5  | 0.9 | 5                                          | 5  | 1.0 | 5                                            | 5  | 1.0 | 160**                                      | 5   |      |
| Influenza B         | 5                                            | 5  |     | 5                                             | 5   |     | 5                                         | 5  |     | 5                                           | 5  |     | 5                                         | 5  |     | 5                                          | 5  |     | 5                                            | 5  |     | 5                                          | 5   | 1.0  |
| A(H1N1)pdm09        | 5                                            | 5  |     | 5                                             | 5   |     | 5                                         | 5  |     | 5                                           | 5  |     | 5                                         | 5  |     | 5                                          | 5  |     | 5                                            | 5  |     | 5                                          | 5   |      |
| <b>Day 54/Ch+5</b>  |                                              |    |     |                                               |     |     |                                           |    |     |                                             |    |     |                                           |    |     |                                            |    |     |                                              |    |     |                                            |     |      |
| sH1N1               | 80                                           | 5  |     | 40                                            | 57  |     | 5                                         | 5  |     | 5                                           | 5  |     | 10                                        | 5  |     | 20                                         | 5  |     | 10                                           | 5  |     | 10                                         | 5   |      |
| sH3N2               | 10                                           | 5  | 0.3 | 80                                            | 80  | 0.1 | 5                                         | 5  | 0.2 | 5                                           | 5  | 0.2 | 5                                         | 5  | 1.1 | 5                                          | 5  | 1.1 | 5                                            | 5  | 0.9 | 5                                          | 5   | 1.0  |
| Influenza B         | NA                                           | NA |     | NA                                            | NA  |     | NA                                        | NA |     | NA                                          | NA |     | NA                                        | NA |     | NA                                         | NA |     | NA                                           | NA |     | NA                                         | NA  |      |
| A(H1N1)pdm09        | 5                                            | 20 |     | 5                                             | 7.1 |     | 5                                         | 10 |     | 5                                           | 5  |     | 5                                         | 10 |     | 5                                          | 5  |     | 5                                            | 10 |     | 5                                          | 7.1 |      |

Lung score = Combined lung inflammatory score at sacrifice Ch+5; % wt loss = percentage weight loss from baseline at Ch+5 (the study day with the greatest between-group difference in % weight loss); Ch=challenge; NA=Not available

sH1N1= seasonal H1N1=A/Brisbane/59/2007(H1N1)-like

sH3N2= seasonal H3N2=A/Brisbane/10/2007(H3N2)-like

Influenza B=B/Florida/4/2006(like)-like

A(H1N1)pdm09=A/California/7/2009-like

Titerls <10 assigned a value of 5.

ELISA values <0.60 considered positive; values ≥ 0.60 negative

\*Geometric mean titer of duplicate HI and MN values displayed

\*\*In the context of surrounding values and given that influenza B is not an animal pathogen, these titers are interpreted as non-specific reactivity. On repeat, both titers were 40 or less but there remained insufficient sera for further dilutional clarification. In deriving summary statistics, these values were therefore retained.
