# Supplementary material for: Randomized Controlled Ferret Study to Assess the Direct Impact of 2008–09 Trivalent Inactivated Influenza Vaccine on A(H1N1)pdm09 Disease Risk
Source: PubMed Central journal article supplement (PMC3903544; doi:10.1371/journal.pone.0086555), 2014-01-27
Supplement: pone.0086555.s007.pdf [file pone.0086555.s007.pdf]

**Table S6. Individual ferret haemagglutination inhibition (HI), microneutralization (MN) and ELISA (E) antibody titers among animals sacrificed at day 63 (Ch+14) with percent weight loss at Ch+5, Placebo Group**

| Ferret ID:          | 52<br>[% wt loss = 4.1] |      |     | 53<br>[% wt loss = 5.4] |      |      | 55<br>[% wt loss = 5.2] |       |     | 64<br>[% wt loss = 7.1] |       |     | 66<br>[% wt loss = 4.4] |       |     | 67<br>[% wt loss = 1.8] |    |     | 71<br>[% wt loss = 1.1] |      |     | 73<br>[% wt loss = 7.2] |      |     | 75<br>[% wt loss = 5.3] |      |      | 77<br>[% wt loss = 11.3] |      |     | 78<br>[% wt loss = 3.9] |      |     | 79<br>[% wt loss = 7.2] |      |     |    |
|---------------------|-------------------------|------|-----|-------------------------|------|------|-------------------------|-------|-----|-------------------------|-------|-----|-------------------------|-------|-----|-------------------------|----|-----|-------------------------|------|-----|-------------------------|------|-----|-------------------------|------|------|--------------------------|------|-----|-------------------------|------|-----|-------------------------|------|-----|----|
|                     | HI                      | MN   | E   | HI                      | MN   | E    | HI                      | MN    | E   | HI                      | MN    | E   | HI                      | MN    | E   | HI                      | MN | E   | HI                      | MN   | E   | HI                      | MN   | E   | HI                      | MN   | E    | HI                       | MN   | E   | HI                      | MN   | E   | HI                      | MN   | E   |    |
| <b>Pre-Shipment</b> |                         |      |     |                         |      |      |                         |       |     |                         |       |     |                         |       |     |                         |    |     |                         |      |     |                         |      |     |                         |      |      |                          |      |     |                         |      |     |                         |      |     |    |
| sH1N1               | 5                       | NA   |     | 5                       | NA   |      | 5                       | NA    |     | 5                       | NA    |     | 5                       | NA    |     | 5                       | NA |     | 5                       | NA   |     | 5                       | NA   |     | 5                       | NA   |      | 5                        | NA   |     | 5                       | NA   |     | 5                       | NA   |     |    |
| H3N2                | 5                       | NA   |     | 5                       | NA   |      | 5                       | NA    |     | 5                       | NA    |     | 5                       | NA    |     | 5                       | NA |     | 5                       | NA   |     | 5                       | NA   |     | 5                       | NA   |      | 5                        | NA   |     | 5                       | NA   |     | 5                       | NA   |     |    |
| Influenza B         | 5                       | NA   | 1.1 | 5                       | NA   | 1.1  | 5                       | NA    | 1.2 | 5                       | NA    | 1.2 | 5                       | NA    | 1.0 | 5                       | NA | 1.1 | 5                       | NA   | 1.0 | 5                       | NA   | 1.1 | 5                       | NA   | 1.1  | 5                        | NA   | 1.4 | 5                       | NA   | 1.5 | 5                       | NA   | 1.4 |    |
| A(H1N1)pdm09        | 5                       | NA   |     | 5                       | NA   |      | 5                       | NA    |     | 5                       | NA    |     | 5                       | NA    |     | 5                       | NA |     | 5                       | NA   |     | 5                       | NA   |     | 5                       | NA   |      | 5                        | NA   |     | 5                       | NA   |     | 5                       | NA   |     |    |
| <b>Day 0</b>        |                         |      |     |                         |      |      |                         |       |     |                         |       |     |                         |       |     |                         |    |     |                         |      |     |                         |      |     |                         |      |      |                          |      |     |                         |      |     |                         |      |     |    |
| sH1N1               | 5                       | 5    |     | 5                       | 5    |      | 20                      | 5     |     | 5                       | 5     |     | 7                       | 5     |     | 10                      | 5  |     | 5                       | 5    |     | 5                       | 5    |     | 5                       | 5    |      | 5                        | 5    |     | 5                       | 5    |     | 5                       | 5    |     |    |
| H3N2                | 5                       | 5    |     | 5                       | 5    |      | 5                       | 5     |     | 5                       | 5     |     | 5                       | 5     |     | 5                       | 5  |     | 5                       | 5    |     | 5                       | 5    |     | 5                       | 5    |      | 5                        | 5    |     | 5                       | 5    |     | 5                       | 5    |     |    |
| Influenza B         | 5                       | 5    | 1.1 | 5                       | 5    | 1.0  | 5                       | 5     | 1.2 | 5                       | 5     | 1.0 | 5                       | 5     | 1.0 | 5                       | 5  | 1.1 | 5                       | 5    | 1.0 | 5                       | 5    | 1.1 | 5                       | 5    | 1.1  | 5                        | 5    | 1.0 | 5                       | 5    | 1.0 | 5                       | 5    | 1.0 |    |
| A(H1N1)pdm09        | 5                       | 5    |     | 5                       | 5    |      | 5                       | 5     |     | 5                       | 5     |     | 5                       | 5     |     | 5                       | 5  |     | 5                       | 5    |     | 5                       | 5    |     | 5                       | 5    |      | 5                        | 5    |     | 5                       | 5    |     | 5                       | 5    |     |    |
| <b>Day 28</b>       |                         |      |     |                         |      |      |                         |       |     |                         |       |     |                         |       |     |                         |    |     |                         |      |     |                         |      |     |                         |      |      |                          |      |     |                         |      |     |                         |      |     |    |
| sH1N1               | 5                       | 5    |     | 10                      | 5    |      | 5                       | 5     |     | 5                       | 5     |     | 5                       | 5     |     | 5                       | 5  |     | 5                       | 5    |     | 5                       | 5    |     | 5                       | 5    |      | 5                        | 5    |     | 5                       | 5    |     | 5                       | 5    |     |    |
| H3N2                | 5                       | 5    |     | 5                       | 5    |      | 5                       | 5     |     | 5                       | 5     |     | 5                       | 5     |     | 5                       | 5  |     | 5                       | 5    |     | 5                       | 5    |     | 5                       | 5    |      | 5                        | 5    |     | 5                       | 5    |     | 5                       | 5    |     |    |
| Influenza B         | NA                      | NA   | NA  | NA                      | NA   | NA   | NA                      | NA    | NA  | NA                      | NA    | NA  | NA                      | NA    | NA  | NA                      | NA | NA  | NA                      | NA   | NA  | NA                      | NA   | NA  | NA                      | NA   | NA   | NA                       | NA   | NA  | NA                      | NA   | NA  | NA                      | NA   | NA  | NA |
| A(H1N1)pdm09        | 5                       | 5    |     | 5                       | 5    |      | 5                       | 5     |     | 5                       | 5     |     | 5                       | 5     |     | 5                       | 5  |     | 5                       | 5    |     | 5                       | 5    |     | 5                       | 5    |      | 5                        | 5    |     | 5                       | 5    |     | 5                       | 5    |     |    |
| <b>Day 49/Ch0</b>   |                         |      |     |                         |      |      |                         |       |     |                         |       |     |                         |       |     |                         |    |     |                         |      |     |                         |      |     |                         |      |      |                          |      |     |                         |      |     |                         |      |     |    |
| sH1N1               | 5                       | 5    |     | 5                       | 5    |      | 5                       | 5     |     | 5                       | 5     |     | 5                       | 5     |     | 5                       | 5  |     | NA                      | 5    |     | 5                       | 5    |     | 28                      | 5    |      | NA                       | NA   |     | 5                       | 5    |     | 7                       | 5    |     |    |
| H3N2                | 5                       | 5    |     | 5                       | 5    |      | 5                       | 5     |     | 5                       | 5     |     | 5                       | 5     |     | 5                       | 5  |     | NA                      | 5    | NA  | 5                       | 5    |     | 5                       | 5    | NA   | NA                       | NA   | NA  | 5                       | 5    | 1.1 | 5                       | 5    | 1.1 |    |
| Influenza B         | 5                       | 5    | 1.0 | 5                       | 5    | 1.0  | 5                       | 5     | 1.0 | 5                       | 5     | 1.0 | 5                       | 5     | 1.0 | 5                       | 5  | 1.0 | NA                      | NA   | NA  | 5                       | 5    | 1.1 | 5                       | 5    | NA   | NA                       | NA   | NA  | 5                       | 5    | 1.1 | 5                       | 5    | 1.1 |    |
| A(H1N1)pdm09        | 5                       | 5    |     | 5                       | 5    |      | 5                       | 5     |     | 5                       | 5     |     | 5                       | 5     |     | 5                       | 5  |     | NA                      | 5    |     | 5                       | 5    |     | 5                       | 5    |      | NA                       | NA   |     | 5                       | 5    |     | 5                       | 5    |     |    |
| <b>Day 63/Ch+14</b> |                         |      |     |                         |      |      |                         |       |     |                         |       |     |                         |       |     |                         |    |     |                         |      |     |                         |      |     |                         |      |      |                          |      |     |                         |      |     |                         |      |     |    |
| sH1N1               | 5                       | 5    |     | 5                       | 5    |      | 10                      | 5     |     | 5                       | 5     |     | 5                       | 5     |     | NA                      | NA |     | 5                       | 5    |     | 5                       | 5    |     | 5                       | 5    |      | 7                        | 5    |     | 5                       | 5    |     | 5                       | 5    |     |    |
| H3N2                | 5                       | 5    |     | 5                       | 5    |      | 5                       | 5     |     | 5                       | 5     |     | 5                       | 5     |     | NA                      | NA | NA  | 5                       | 5    | 0.4 | 5                       | 5    |     | 5                       | 5    |      | 5                        | 5    |     | 5                       | 5    |     | 5                       | 5    |     |    |
| Influenza B         | NA                      | NA   | 0.5 | NA                      | NA   | 0.61 | NA                      | NA    | 0.5 | NA                      | NA    | 0.5 | NA                      | NA    | 0.4 | NA                      | NA | NA  | NA                      | NA   | NA  | 5                       | 5    | 0.3 | NA                      | NA   | 0.61 | NA                       | NA   | 0.4 | NA                      | NA   | 0.4 | NA                      | NA   | 0.4 |    |
| A(H1N1)pdm09        | 5120                    | 7240 |     | 2560                    | 7240 |      | 5120                    | 20480 |     | 2560                    | 14480 |     | 1810                    | 14480 |     | NA                      | NA |     | 2560                    | 3620 |     | 2560                    | 3620 |     | 3620                    | 3620 |      | 3620                     | 5120 |     | 2560                    | 2560 |     | 2560                    | 5120 |     |    |

% wt loss = percentage weight loss from baseline at Ch+5 (the study day with the greatest between-group difference in % weight loss); Ch=challenge; NA=Not available

sH1N1= seasonal H1N1=A/Brisbane/59/2007(H1N1)-like

sH3N2= seasonal H3N2=A/Brisbane/10/2007(H3N2)-like

Influenza B=B/Florida/4/2006(like)-like

A(H1N1)pdm09=A/California/7/2009-like

Titers <10 assigned a value of 5.

ELISA values <0.60 considered positive; values ≥ 0.60 negative

\*Geometric mean titer of duplicate HI and MN values displayed
