# Supplementary material for: Randomized Controlled Ferret Study to Assess the Direct Impact of 2008–09 Trivalent Inactivated Influenza Vaccine on A(H1N1)pdm09 Disease Risk
Source: PubMed Central journal article supplement (PMC3903544; doi:10.1371/journal.pone.0086555), 2014-01-27
Supplement: pone.0086555.s008.pdf [file pone.0086555.s008.pdf]

**Table S7. Summary haemagglutination inhibition results by time, study group and antigen**

| Time Point<br>(N per group),<br>Influenza antigens<br><small>a,b,c,d</small> | Titer ≥40    |                         | Titer ≥10    |                         | GMT (95%CI)      |                  | Sero-conversion <sup>e</sup> |                         | GMTR <sup>e</sup> |                         |
|------------------------------------------------------------------------------|--------------|-------------------------|--------------|-------------------------|------------------|------------------|------------------------------|-------------------------|-------------------|-------------------------|
|                                                                              | Vaccine<br>n | Placebo<br>n            | Vaccine<br>n | Placebo<br>n            | Vaccine<br>n     | Placebo<br>n     | Vaccine<br>n                 | Placebo<br>n            | Vaccine<br>n      | Placebo<br>n            |
| <b>Pre-Shipment (16)</b>                                                     | <b>N=16</b>  | <b>N=16</b>             | <b>N=16</b>  | <b>N=16</b>             | <b>N=16</b>      | <b>N=16</b>      | <b>NA</b>                    | <b>NA</b>               | <b>NA</b>         | <b>NA</b>               |
| Seasonal H1N1                                                                | 0            | 0                       | 0            | 0                       | 5                | 5                | NA                           | NA                      | NA                | NA                      |
| Seasonal H3N2                                                                | 0            | 0                       | 0            | 0                       | 5                | 5                | NA                           | NA                      | NA                | NA                      |
| Influenza B                                                                  | 0            | 0                       | 0            | 1                       | 5                | 5                | NA                           | NA                      | NA                | NA                      |
| A(H1N1)pdm09                                                                 | 0            | 0                       | 0            | 0                       | 5                | 5                | NA                           | NA                      | NA                | NA                      |
| <b>Day 0 (16)</b>                                                            | <b>N=16</b>  | <b>N=15<sup>f</sup></b> | <b>N=16</b>  | <b>N=15<sup>f</sup></b> | <b>N=16</b>      | <b>N=15</b>      | <b>NA</b>                    | <b>NA</b>               | <b>NA</b>         | <b>NA</b>               |
| Seasonal H1N1                                                                | 0            | 0                       | 5            | 2                       | 6.3 (5.2-7.7)    | 5.9 (4.7-.3)     | NA                           | NA                      | NA                | NA                      |
| Seasonal H3N2                                                                | 0            | 0                       | 0            | 0                       | 5                | 5                | NA                           | NA                      | NA                | NA                      |
| Influenza B                                                                  | 0            | 0                       | 0            | 0                       | 5                | 5                | NA                           | NA                      | NA                | NA                      |
| A(H1N1)pdm09                                                                 | 0            | 0                       | 0            | 0                       | 5                | 5                | NA                           | NA                      | NA                | NA                      |
| <b>Day 28 (16)</b>                                                           | <b>N=16</b>  | <b>N=16</b>             | <b>N=16</b>  | <b>N=16</b>             | <b>N=16</b>      | <b>N=16</b>      | <b>N=16</b>                  | <b>N=16<sup>f</sup></b> | <b>N=16</b>       | <b>N=16<sup>f</sup></b> |
| Seasonal H1N1                                                                | 2            | 0                       | 4            | 1                       | 7.4 (5.1-10.7)   | 5.5 (4.9-6.1)    | 2                            | 0                       | 1.16              | 0.94                    |
| Seasonal H3N2                                                                | 2            | 0                       | 3            | 1                       | 7.4 (4.5-12.2)   | 5.2 (4.8-5.7)    | 2                            | 0                       | 1.48              | 1.04                    |
| Influenza B                                                                  | ND           | ND                      | ND           | ND                      | ND               | ND               | ND                           | ND                      | ND                | ND                      |
| A(H1N1)pdm09                                                                 | 0            | 0                       | 0            | 0                       | 5                | 5                | 0                            | 0                       | 1.00              | 1.00                    |
| <b>Day 49/Ch0 (16)</b>                                                       | <b>N=14</b>  | <b>N=14</b>             | <b>N=14</b>  | <b>N=14</b>             | <b>N=14</b>      | <b>N=14</b>      | <b>N=14</b>                  | <b>N=14<sup>f</sup></b> | <b>N=14</b>       | <b>N=14<sup>f</sup></b> |
| Seasonal H1N1                                                                | 1            | 1                       | 9            | 2                       | 10.5 (6.5-16.9)  | 7.4 (4.2-13.2)   | 1                            | 0                       | 1.66              | 1.28                    |
| Seasonal H3N2                                                                | 2            | 0                       | 6            | 0                       | 10.0 (5.2-19.1)  | 5                | 2                            | 0                       | 2.00              | 1.00                    |
| Influenza B                                                                  | 0            | 1                       | 0            | 1                       | 5                | 6.4 (3.8-10.9)   | 0                            | 0                       | 1.00              | 1.28                    |
| A(H1N1)pdm09                                                                 | 0            | 0                       | 0            | 0                       | 5                | 5                | 0                            | 0                       | 1.00              | 1.00                    |
| <b>Day 54/Ch+5 (4)</b>                                                       | <b>N=4</b>   | <b>N=4</b>              | <b>N=4</b>   | <b>N=4</b>              | <b>N=4</b>       | <b>N=4</b>       | <b>N=4</b>                   | <b>N=4<sup>f</sup></b>  | <b>N=4</b>        | <b>N=4<sup>f</sup></b>  |
| Seasonal H1N1                                                                | 2            | 0                       | 2            | 4                       | 16.8 (1.7-163.4) | 11.9 (6.9-20.6)  | 2                            | 0                       | 2.65              | 2.04                    |
| Seasonal H3N2                                                                | 1            | 0                       | 2            | 0                       | 11.9 (1.5-95.9)  | 5                | 1                            | 0                       | 2.38              | 1.00                    |
| Influenza B                                                                  | ND           | ND                      | ND           | ND                      | ND               | ND               | ND                           | ND                      | ND                | ND                      |
| A(H1N1)pdm09                                                                 | 0            | 0                       | 0            | 0                       | 5                | 5                | 0                            | 0                       | 1.00              | 1.00                    |
| <b>Day 63/Ch+14 (12)</b>                                                     | <b>N=10</b>  | <b>N=11</b>             | <b>N=10</b>  | <b>N=11</b>             | <b>N=10</b>      | <b>N=11</b>      | <b>N=10</b>                  | <b>N=11</b>             | <b>N=10</b>       | <b>N=11</b>             |
| Seasonal H1N1                                                                | 1            | 0                       | 5            | 1                       | 9.7 (5.2-18.0)   | 5.5 (4.7-6.4)    | 1                            | 0                       | 1.52              | 0.93                    |
| Seasonal H3N2                                                                | 0            | 0                       | 4            | 0                       | 7.1 (5.0-10.0)   | 5                | 1                            | 0                       | 1.41              | 1.00                    |
| Influenza B                                                                  | ND           | ND                      | ND           | ND                      | ND               | ND               | ND                           | ND                      | ND                | ND                      |
| A(H1N1)pdm09                                                                 | 10           | 11                      | 10           | 11                      | 2307 (1731-3076) | 2997 (2411-3725) | 10                           | 11                      | 461               | 599                     |

Sero-conversion = number with four-fold or greater rise in geometric mean titer (GMT) or from titer <10 to at least 40. Titers <10 assigned a value of 5; NA=Not Applicable; ND= Not done; Ch=challenge; GMTR: GMT ratio relative to Day 0. Where numbers (N) differ from the number randomized per group it is because insufficient sera remained for testing of all animals.

a. Seasonal H1N1=A/Brisbane/59/2007(H1N1)-like; b. Seasonal H3N2=A/Brisbane/10/2007(H3N2)-like; c. Influenza B=B/Florida/4/2006-like; d. A(H1N1)pdm09=A/California/07/2009-like; e. Relative to Day 0; f. Missing pre-immunization (Day 0) serum for one placebo ferret substituted with pre-shipment serum for deriving sero-conversion and GMTR.
