# Supplementary material for: Randomized Controlled Ferret Study to Assess the Direct Impact of 2008–09 Trivalent Inactivated Influenza Vaccine on A(H1N1)pdm09 Disease Risk
Source: PubMed Central journal article supplement (PMC3903544; doi:10.1371/journal.pone.0086555), 2014-01-27
Supplement: pone.0086555.s009.pdf [file pone.0086555.s009.pdf]

**Table S8. Summary microneutralization results by time, study group and antigen**

| Time Point<br>(N per group),<br>Influenza antigens<br>a,b,c,d | Titer ≥40      |              | Titer ≥10      |              | GMT (95%CI)                 |                   | Sero-conversion <sup>e</sup> |              | GMTR <sup>e</sup> |              |
|---------------------------------------------------------------|----------------|--------------|----------------|--------------|-----------------------------|-------------------|------------------------------|--------------|-------------------|--------------|
|                                                               | Vaccine<br>n   | Placebo<br>n | Vaccine<br>n   | Placebo<br>n | Vaccine<br>n                | Placebo<br>n      | Vaccine<br>n                 | Placebo<br>n | Vaccine<br>n      | Placebo<br>n |
| <b>Day 0 (16)</b>                                             | <b>N=14</b>    | <b>N=15</b>  | <b>N=14</b>    | <b>N=15</b>  | <b>N=14</b>                 | <b>N=15</b>       | <b>NA</b>                    | <b>NA</b>    | <b>NA</b>         | <b>NA</b>    |
| Seasonal H1N1                                                 | 0              | 0            | 0              | 0            | 5                           | 5                 | NA                           | NA           | NA                | NA           |
| Seasonal H3N2                                                 | 0 <sup>f</sup> | 0            | 0 <sup>f</sup> | 0            | 5 <sup>f</sup>              | 5                 | NA                           | NA           | NA                | NA           |
| Influenza B                                                   | 0              | 0            | 0              | 0            | 5                           | 5                 | NA                           | NA           | NA                | NA           |
| A(H1N1)pdm09                                                  | 0              | 0            | 0              | 0            | 5                           | 5                 | NA                           | NA           | NA                | NA           |
| <b>Day 28 (16)</b>                                            | <b>N=16</b>    | <b>N=16</b>  | <b>N=16</b>    | <b>N=16</b>  | <b>N=16</b>                 | <b>N=16</b>       | <b>N=14</b>                  | <b>N=15</b>  | <b>N=14</b>       | <b>N=15</b>  |
| Seasonal H1N1                                                 | 2              | 0            | 4              | 0            | 7.5 (4.7-12.1)              | 5                 | 0                            | 0            | 1.51              | 1.00         |
| Seasonal H3N2                                                 | 2              | 0            | 2              | 0            | 7.5 (4.4-12.8)              | 5                 | 2 <sup>f</sup>               | 0            | 1.51              | 1.00         |
| Influenza B                                                   | ND             | ND           | ND             | ND           | ND                          | ND                | ND                           | ND           | ND                | ND           |
| A(H1N1)pdm09                                                  | 0              | 0            | 0              | 0            | 5                           | 5                 | 0                            | 0            | 1.00              | 1.00         |
| <b>Day 49/Ch0 (16)</b>                                        | <b>N=15</b>    | <b>N=15</b>  | <b>N=15</b>    | <b>N=15</b>  | <b>N=15</b>                 | <b>N=15</b>       | <b>N=15</b>                  | <b>N=14</b>  | <b>N=15</b>       | <b>N=14</b>  |
| Seasonal H1N1                                                 | 3              | 0            | 7              | 0            | 12.3 (6.2-24.5)             | 5                 | 1 <sup>g</sup>               | 0            | 1.56 <sup>g</sup> | 1.00         |
| Seasonal H3N2                                                 | 2              | 0            | 5              | 0            | 10.7 (5.1-22.5)             | 5                 | 2                            | 0            | 2.14              | 1.00         |
| Influenza B                                                   | 1 <sup>g</sup> | 0            | 3 <sup>g</sup> | 0            | 7.1 (4.2-12.0) <sup>g</sup> | 5                 | 0 <sup>h</sup>               | 0            | 1.22 <sup>h</sup> | 1.00         |
| A(H1N1)pdm09                                                  | 0 <sup>i</sup> | 0            | 0 <sup>i</sup> | 0            | 5 <sup>i</sup>              | 5                 | 0 <sup>h</sup>               | 0            | 1.00 <sup>h</sup> | 1.00         |
| <b>Day 54/Ch+5 (4)</b>                                        | <b>N=4</b>     | <b>N=4</b>   | <b>N=4</b>     | <b>N=4</b>   | <b>N=4</b>                  | <b>N=4</b>        | <b>N=4</b>                   | <b>N=3</b>   | <b>N=4</b>        | <b>N=3</b>   |
| Seasonal H1N1                                                 | 1              | 0            | 1              | 0            | 9.2 (1.3-63.2)              | 5                 | 0 <sup>j</sup>               | 0            | 1.83 <sup>j</sup> | 1.00         |
| Seasonal H3N2                                                 | 1              | 0            | 1              | 0            | 10.0 (1.1-90.8)             | 5                 | 1                            | 0            | 2.00              | 1.00         |
| Influenza B                                                   | ND             | ND           | ND             | ND           | ND                          | ND                | ND                           | ND           | ND                | ND           |
| A(H1N1)pdm09                                                  | 0              | 0            | 2              | 2            | 9.2 (3.6-23.5)              | 7.7 (4.5-13.1)    | 0 <sup>j</sup>               | 0            | 1.83 <sup>j</sup> | 1.54         |
| <b>Day 63/Ch+14 (12)</b>                                      | <b>N=11</b>    | <b>N=11</b>  | <b>N=11</b>    | <b>N=11</b>  | <b>N=11</b>                 | <b>N=11</b>       | <b>N=10</b>                  | <b>N=11</b>  | <b>N=10</b>       | <b>N=11</b>  |
| Seasonal H1N1                                                 | 2              | 0            | 6              | 0            | 14.1 (6.4-31.3)             | 5                 | 1                            | 0            | 2.83              | 1.00         |
| Seasonal H3N2                                                 | 2              | 0            | 6              | 0            | 14.1 (6.5-30.6)             | 5                 | 2 <sup>k</sup>               | 0            | 2.83 <sup>k</sup> | 1.00         |
| Influenza B                                                   | ND             | ND           | ND             | ND           | ND                          | ND                | ND                           | ND           | ND                | ND           |
| A(H1N1)pdm09                                                  | 11             | 11           | 11             | 11           | 5284 (3062-9118)            | 6383 (4041-10083) | 10                           | 11           | 1057              | 1277         |

Sero-conversion = number with four-fold or greater rise in geometric mean titer (GMT) or from titer <10 to at least 40. Titers <10 assigned a value of 5; NA=Not Applicable; ND= Not done; Ch=challenge; GMTR: GMT ratio relative to Day 0. Where numbers (N) differ from the number randomized per group it is because insufficient sera remained for testing of all animals.

a. Seasonal H1N1=A/Brisbane/59/2007(H1N1)-like; b. Seasonal H3N2=A/Brisbane/10/2007(H3N2)-like; c. Influenza B=B/Florida/4/2006-like; d. A(H1N1)pdm09=A/California/07/2009-like; e. Relative to Day 0; f. N=16; g. N=13; h. N=12; i. N=14; j. N=3; k. N=11;
