# Supplementary material for: Randomized Controlled Ferret Study to Assess the Direct Impact of 2008–09 Trivalent Inactivated Influenza Vaccine on A(H1N1)pdm09 Disease Risk
Source: PubMed Central journal article supplement (PMC3903544; doi:10.1371/journal.pone.0086555), 2014-01-27
Supplement: pone.0086555.s010.pdf [file pone.0086555.s010.pdf]

**Table S9. Individual ferret lung histopathology scores at sacrifice days 5 (Ch+5) or 14 (Ch+14) post-challenge and % weight loss from baseline at Ch+5**

| Ferret ID | Group   | Day Post-Challenge (Ch+5/14) | Inflammatory Indicators |                |               |              |         |                |                       | Other Indicators    |                 | Lung virus titer (log pfu/mL) | % weight loss from baseline at Ch+5 <sup>a</sup> |
|-----------|---------|------------------------------|-------------------------|----------------|---------------|--------------|---------|----------------|-----------------------|---------------------|-----------------|-------------------------------|--------------------------------------------------|
|           |         |                              | Endo/bronchial          | Peri-bronchial | Peri-vascular | Interstitial | Pleural | Intra alveolar | Combined Inflammatory | Vascluar Congestion | Pulmonary Edema |                               |                                                  |
| 63*       | Vaccine | 5                            | 0                       | 0              | 0.5           | 0            | 0       | 0              | 0.5                   | 0.5                 | 0               | 4.88                          | 3.7                                              |
| 69*       | Vaccine | 5                            | 2.5                     | 2              | 1             | 2            | 1       | 3              | 11.5                  | 1.5                 | 1               | 5.25                          | 7.8                                              |
| 80        | Vaccine | 5                            | 0                       | 1              | 0             | 0            | 0       | 0              | 1                     | 0.5                 | 0.5             | 4.70                          | 6.0                                              |
| 82        | Vaccine | 5                            | 3                       | 3              | 1             | 1            | 0       | 2              | 10                    | 2                   | 1               | 5.02                          | 10.0                                             |
| 58*       | Placebo | 5                            | 2                       | 1              | 0.5           | 0.5          | 0       | 0              | 4                     | 1.5                 | 1               | 3.95                          | 7.7                                              |
| 60        | Placebo | 5                            | 2                       | 1              | 0             | 0            | 0       | 0              | 3                     | 0.5                 | 0               | 4.69                          | 4.8                                              |
| 81*       | Placebo | 5                            | 0                       | 0.5            | 0             | 0            | 0       | 0              | 0.5                   | 0.5                 | 0               | 4.11                          | 4.9                                              |
| 84        | Placebo | 5                            | 0                       | 0.5            | 0.5           | 0            | 0       | 0              | 1                     | 0.5                 | 0               | 4.17                          | 1.1                                              |
| 51        | Vaccine | 14                           | 0                       | 0              | 0             | 0            | 0.5     | 0              | 0.5                   | 0                   | 0               | 0                             | 10.6                                             |
| 54        | Vaccine | 14                           | 0                       | 1              | 0.5           | 1            | 0       | 0              | 2.5                   | 0.5                 | 0               | 0                             | 7.3                                              |
| 56        | Vaccine | 14                           | 0                       | 1              | 0             | 1            | 0       | 0              | 2                     | 1                   | 0               | 0                             | 9.8                                              |
| 57        | Vaccine | 14                           | 0                       | 0              | 0.5           | 0.5          | 0       | 0              | 1                     | 1                   | 0               | 0                             | 5.4                                              |
| 59        | Vaccine | 14                           | 0                       | 1              | 1             | 0            | 0       | 0              | 2                     | 0                   | 0               | 0                             | 7.9                                              |
| 61        | Vaccine | 14                           | 0                       | 1              | 1             | 1.5          | 0       | 0              | 3.5                   | 0                   | 0               | 0                             | 8.3                                              |
| 62        | Vaccine | 14                           | 0                       | 0.5            | 0.5           | 0            | 0       | 0              | 1                     | 0                   | 0               | 0                             | 4.6                                              |
| 65        | Vaccine | 14                           | 0                       | 1.5            | 1.5           | 1.5          | 0       | 0              | 4.5                   | 0                   | 0               | 0                             | 5.4                                              |
| 68        | Vaccine | 14                           | 0                       | 0.5            | 0.5           | 0            | 0       | 0              | 1                     | 0                   | 0               | 0                             | 6.5                                              |
| 70        | Vaccine | 14                           | 0                       | 0.5            | 0.5           | 0.5          | 0       | 0              | 1.5                   | 0                   | 0               | 0                             | 2.4                                              |
| 72        | Vaccine | 14                           | 0                       | 0.5            | 0.5           | 0            | 0       | 0              | 1                     | 0                   | 0               | 0                             | 10.5                                             |
| 85        | Vaccine | 14                           | 0                       | 0              | 0.5           | 0.5          | 0       | 0              | 1                     | 0                   | 0               | 0                             | 12.1                                             |
| 52        | Placebo | 14                           | 0                       | 0              | 0.5           | 0            | 0       | 0              | 0.5                   | 0.5                 | 0               | 0                             | 4.1                                              |
| 53        | Placebo | 14                           | 0                       | 0              | 0             | 0.5          | 0       | 0              | 0.5                   | 0.5                 | 0               | 0                             | 5.4                                              |
| 55        | Placebo | 14                           | 0                       | 0              | 0             | 0            | 0       | 0              | 0                     | 0                   | 0               | 0                             | 5.2                                              |
| 66        | Placebo | 14                           | 1                       | 1              | 1.5           | 0            | 0       | 0              | 3.5                   | 0                   | 0               | 0                             | 4.4                                              |
| 67        | Placebo | 14                           | 1.5                     | 2              | 1             | 1            | 0       | 0              | 5.5                   | 0                   | 0               | 0                             | 1.8                                              |
| 71        | Placebo | 14                           | 0.5                     | 0.5            | 0.5           | 0            | 0       | 0              | 1.5                   | 0                   | 0               | 0                             | 1.1                                              |
| 73        | Placebo | 14                           | 0                       | 1              | 0.5           | 0.5          | 0       | 0              | 2                     | 0                   | 0               | 0                             | 7.2                                              |
| 75        | Placebo | 14                           | 0                       | 0.5            | 0.5           | 0            | 0       | 0              | 1                     | 0                   | 0               | 0                             | 5.3                                              |
| 78        | Placebo | 14                           | 1                       | 2              | 1.5           | 0.5          | 0       | 0              | 5                     | 0                   | 0               | 0                             | 3.9                                              |
| 79        | Placebo | 14                           | 0                       | 0.5            | 0.5           | 0.5          | 0       | 0              | 1.5                   | 0                   | 0               | 0                             | 7.2                                              |
| 64        | Placebo | 14                           | 0                       | 1              | 0             | 0.5          | 0       | 0              | 1.5                   | 0                   | 0               | 0                             | 7.1                                              |
| 77        | Placebo | 14                           | 0.5                     | 2              | 2             | 2            | 0       | 0              | 6.5                   | 0                   | 0               | 0                             | 11.3                                             |

Individual indicators scored from 0 (normal), 1 (mild), 2 (moderate) or 3 (marked) for a maximum combined inflammatory score of 18.

\*Photo illustration of lung histo-pathology at Ch+5 (**Figure 4**)

a. The greatest between-group difference in percentage weight loss from baseline was at Ch+5, overall and among animals sacrificed at Ch+5 or Ch+14. Ch+5 weight loss is thus displayed for context (see text)
